# Supplementary material
Source: PubMed Central journal article supplement (PMC2630596)
Supplement: supp_53_2_765__1.pdf [file supp_53_2_765__1.pdf]

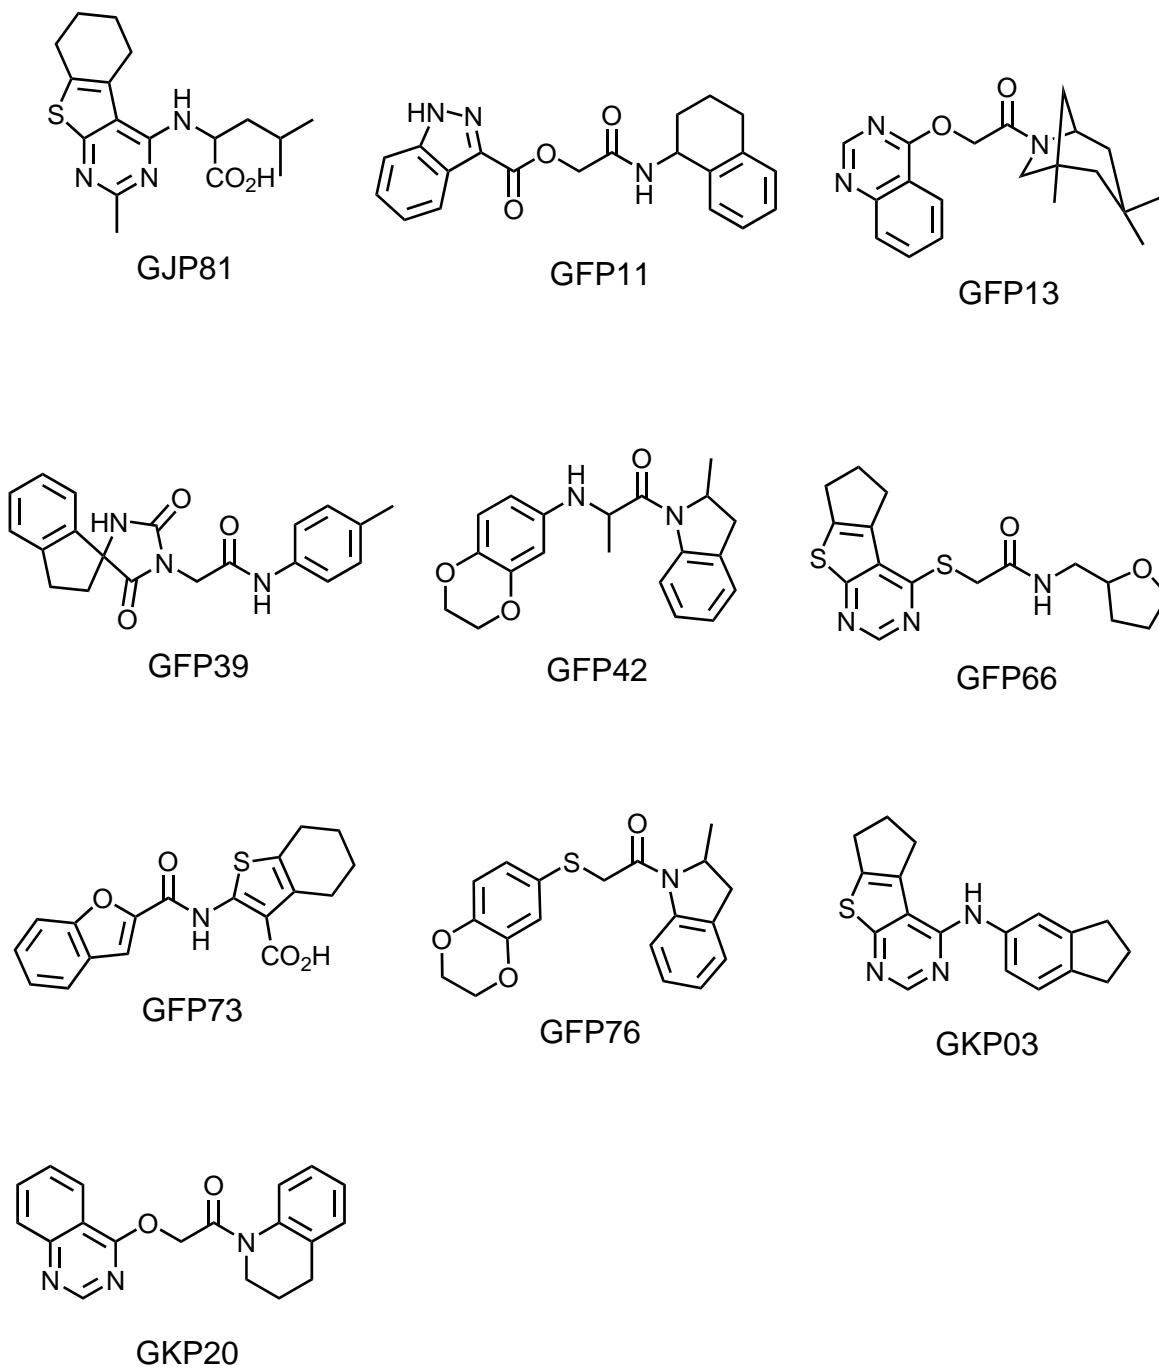

Fig. S1. Chemical structures of compounds belonging to category BNE.

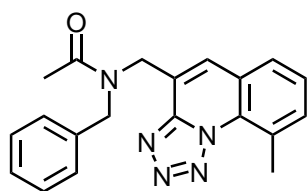

GJP61

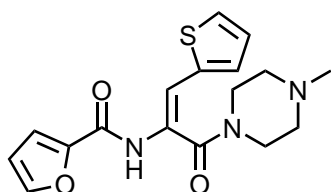

GJP77

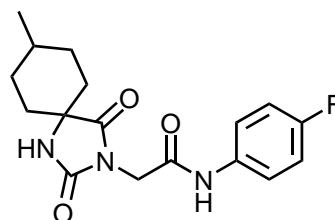

GFP38

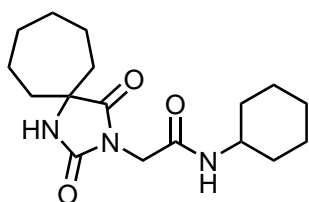

GFP55

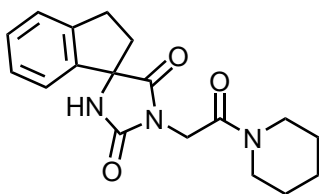

GFP71

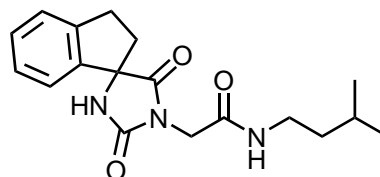

GFP95

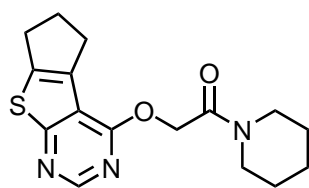

GKP02

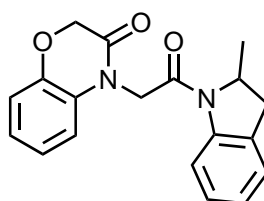

GKP08

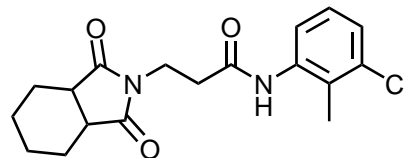

GKP19

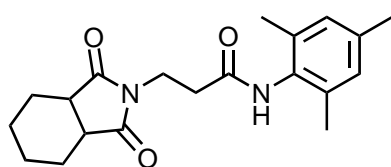

GKP22

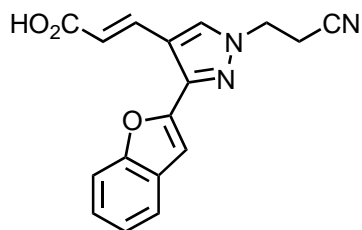

GKP25

Fig. S2. Chemical structures of compounds belonging to category LBNE.

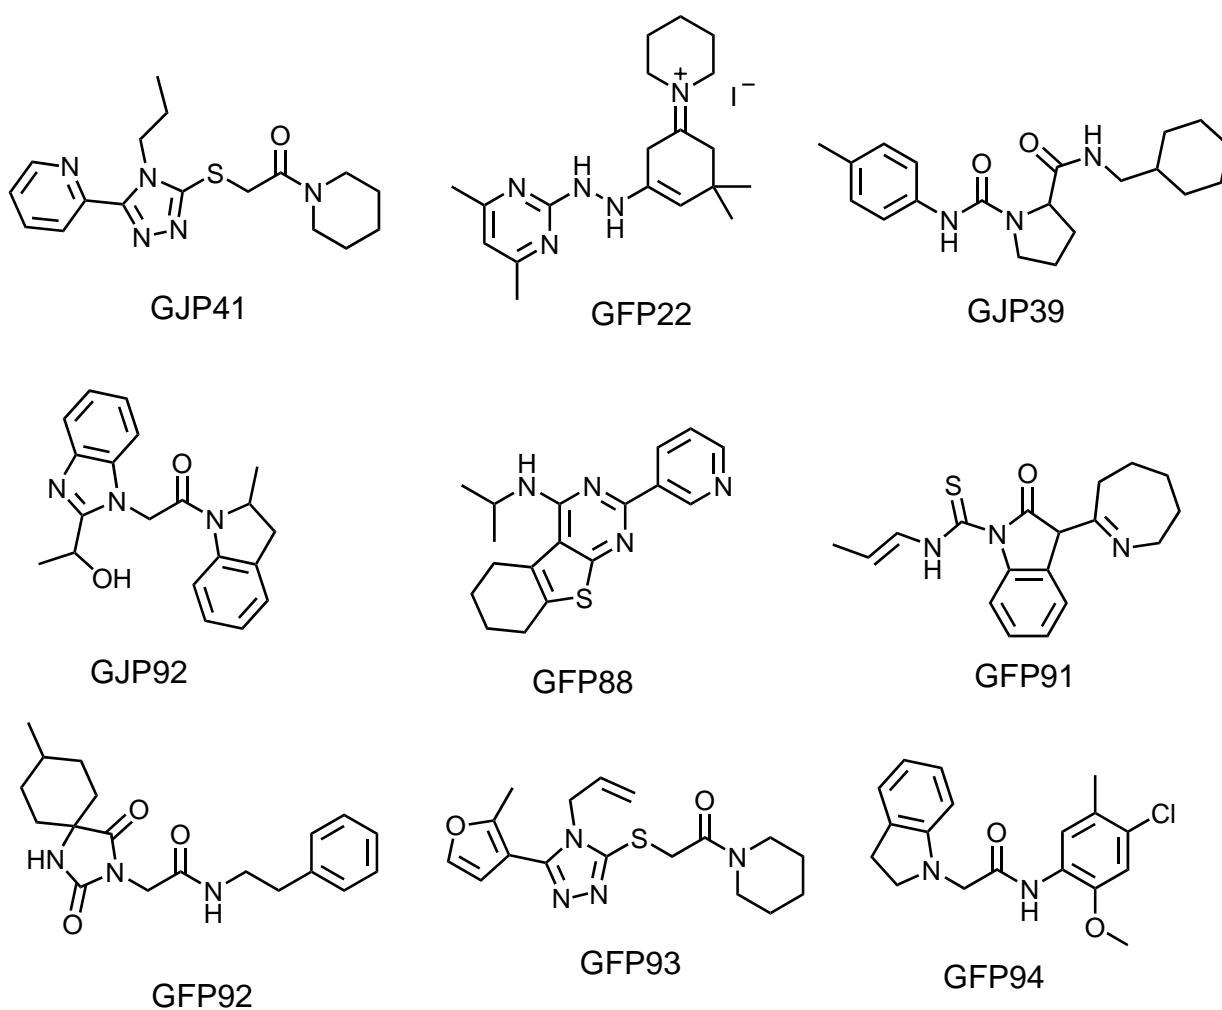

Fig. S3. Chemical structures of GJP41 and GFP22 belonging to category A. Other seven compounds also have increased the levels of PrP<sup>Sc</sup> in the *ex vivo* screening.
